# Supplementary material for: Impact of Delayed Intravitreal Anti-Vascular Endothelial Growth Factor (VEGF) Therapy Due to the Coronavirus Disease Pandemic on the Prognosis of Patients with Neovascular Age-Related Macular Degeneration
Source: MDPI journal article supplement (doi:10.3390/jcm11092321), 2022-04-21
Supplement: s1 [file s1]

**Table S1.** The inclusion and exclusion criteria.

| Inclusion Criteria                                                                                                                                                                            | Exclusion Criteria                                                                                                       |
|-----------------------------------------------------------------------------------------------------------------------------------------------------------------------------------------------|--------------------------------------------------------------------------------------------------------------------------|
| nAMD patient aged $\geq 50$ years                                                                                                                                                             | AMD with a disciform scar or geographic atrophy                                                                          |
| Completed three initial monthly intravitreal anti-VEGF injections                                                                                                                             | Did not require intravitreal anti-VEGF injection due to the lack of disease activity                                     |
| At least one delayed intravitreal anti-VEGF injection between February and June 2020                                                                                                          | High refractive errors more than 4.0 D                                                                                   |
| The delay period is more than the number of weeks equal to the number of average months of follow-up (e.g., $\geq 2$ weeks for patients whose average follow-up interval was 2 months before) | Diseases that could affect anatomical structure of the retina (e.g., diabetic retinopathy, retinal vein occlusion, etc.) |
| Never been late for a medical appointment before February 2020                                                                                                                                | History of intraocular surgery except for cataract surgery                                                               |
| nAMD, neovascular age-related macular degeneration; AMD, age-related macular degeneration, VEGF, vascular endothelial growth factor; D, diopter.                                              |                                                                                                                          |
